# Supplementary material for: Emission of Metals from Pelletized and Uncompressed Biomass Fuels Combustion in Rural Household Stoves in China
Source: PubMed Central journal article supplement — Sci Rep. 2014 Jul 8;4:5611. doi: 10.1038/srep05611 (PMC4085603; doi:10.1038/srep05611), 2014-07-08
Supplement: srep05611-s1.pdf [file srep05611-s1.pdf]

## Supplementary Information

### **Emission of Metals from Pelletized and Uncompressed Biomass Fuels Combustion in Rural Household Stoves in China**

Wei Zhang<sup>1</sup>, Yindong Tong<sup>2</sup>, Huanhuan Wang<sup>2</sup>, Long Chen<sup>2</sup>, Langbo Ou<sup>2</sup>, Xuejun Wang<sup>2\*</sup>, Guohua Liu<sup>1</sup>& Yan Zhu<sup>1</sup>

1. School of Environment and Natural Resources, Renmin University of China, Beijing 100872, China

2. Ministry of Education Laboratory of Earth Surface Processes, College of Urban and Environmental Sciences, Peking University, Beijing 100871, China

## S1. Properties of the biomass fuels

Table S1 Properties of the tested biomass pellets and raw biomass fuels

| Parameter                    | Pine wood pellet                              | Corn straw pellet                  | Pine wood chip                                | Corn straw                         |
|------------------------------|-----------------------------------------------|------------------------------------|-----------------------------------------------|------------------------------------|
| Component                    | Chinese pine<br>( <i>Pinus tabuliformis</i> ) | Corn stalks<br>( <i>Zea mays</i> ) | Chinese pine<br>( <i>Pinus tabuliformis</i> ) | Corn stalks<br>( <i>Zea mays</i> ) |
| Place of origin              | Beijing                                       | Beijing                            | Beijing                                       | Beijing                            |
| Diameter (mm)                | 6                                             | 8                                  | -                                             | -                                  |
| Ash content (%)              | 3.7                                           | 10.8                               | 0.3                                           | 4.0                                |
| Higher heating value (MJ/kg) | 17.83                                         | 15.24                              | 18.51                                         | 17.26                              |
| Density (g/cm <sup>3</sup> ) | 1.3                                           | 1.4                                | 0.4                                           | 0.07                               |
| Volatile matter (%)          | 76.77                                         | 70.62                              | 84.77                                         | 77.94                              |
| Moisture (%)                 | 5.63                                          | 5.80                               | 9.10                                          | 7.02                               |
| Fixed carbon (%)             | 19.48                                         | 18.54                              | 14.98                                         | 18.05                              |
| H (%)                        | 5.84                                          | 5.48                               | 6.32                                          | 6.02                               |
| C (%)                        | 46.78                                         | 43.14                              | 49.10                                         | 43.47                              |
| N (%)                        | 0.16                                          | 1.23                               | 0.18                                          | 0.96                               |
| Cl (%)                       | 0.35                                          | 1.30                               | 0.02                                          | 0.77                               |

## S2. Combustion condition

For combustion of the biomass fuels, parameters including modified combustion efficiency (MCE), product of incomplete combustion (PIC) and burning rate ( $R_b$ ) were calculated to describe the combustion conditions. These parameters are listed in Table S2, and the calculation formulas are:

$$MCE = \frac{C_{CO_2}}{C_{CO_2} + C_{CO}} \quad (1)$$

where  $C_{CO_2}$  and  $C_{CO}$  are the concentrations of  $CO_2$  and  $CO$  emitted from the fuel combustion.

$$PIC = \frac{C_{C-CO} + C_{C-PM} + C_{C-THC}}{C_{C-CO_2}} \quad (2)$$

where  $C_{C-CO_2}$ ,  $C_{C-CO}$ ,  $C_{C-THC}$  and  $C_{C-PM}$  are carbon released as  $CO_2$ , CO, total hydrocarbon (THC) and in particle matter (PM), respectively.

$$R_b = \frac{M}{t} \quad (3)$$

where M (g) is the mass of biomass fuels burnt, t (min) is the time of whole burning cycle.

Table S2 Combustion parameters for biomass pellets and raw biomass fuels.

| Parameter     | Pine wood pellet | Corn straw pellet | Pine wood chip | Corn straw |
|---------------|------------------|-------------------|----------------|------------|
| MCE (%)       | 99.7±2.6         | 96.3±3.4          | 92.2±3.7       | 95.9±1.6   |
| PIC (%)       | 0.426±0.003      | 4.99±1.24         | 3.96±1.23      | 4.15±0.41  |
| $R_b$ (g/min) | 18.5±0.7         | 9.5±0.5           | 83.5±4.9       | 44.1±2.5   |

### S3. Regression analysis

A number of factors including moisture, ash content, C, H, Cl and N of the fuels, MCE,  $R_b$ , and VM were assessed for their influences on EFs using a stepwise regression model. It was revealed that moisture, VM and MCE were included in the regression model. Therefore, the equation to predict EFs of the tested metals can be expressed as follows:

$$EF_s = a + b \times M + c \times VM + d \times MCE$$

Where a, b, c and d are the calculated regression coefficients, and M (moisture), VM and MCE are in unit of %. The regression coefficients and the coefficient of determination ( $R^2$ ) are summarized in Table S3.

Table S3 Results of regression analysis on EFs of Pb, Cu, Cd, As and Ni.

| Regression coefficient                         | Pb      | Cu      | As      | Cd      | Ni      |
|------------------------------------------------|---------|---------|---------|---------|---------|
| a Unstandardized Coefficients                  | 1399.31 | 2586.21 | 7967.95 | 35.323  | 274.83  |
| Standardized Coefficients                      | -       | -       | -       | -       | -       |
| b Unstandardized Coefficients                  | -54.316 | -100.71 | -326.53 | -1.390  | -10.493 |
| Standardized Coefficients                      | -40.039 | -62.2   | -40.496 | -40.169 | -37.109 |
| c Unstandardized Coefficients                  | 7.585   | 14.345  | 47.789  | 0.199   | 1.452   |
| Standardized Coefficients                      | 20.273  | 32.123  | 21.488  | 20.879  | 18.622  |
| d Unstandardized Coefficients                  | -16.772 | -31.241 | -97.945 | -0.428  | -3.274  |
| Standardized Coefficients                      | -23.458 | -36.611 | -23.049 | -23.464 | -21.97  |
| Coefficient of determination (R <sup>2</sup> ) | 0.882   | 0.894   | 0.971   | 0.436   | 0.736   |

#### S4. Calculation of task-based emission factors

Since different amounts of biomass fuels are needed for the same cooking task using different fuel/stove combinations, task-based emission factors are better than mass-based factors for comparing the air pollution potential of different fuel/stove combinations. The calculation formulas are:

$$EF_{\text{task-energy}} = \frac{EF_{\text{mass}}}{HV \times \eta} \times J$$

$$EF_{\text{task-time}} = EF_{\text{mass}} \times R_b \times T \times 60$$

Where  $EF_{\text{task-energy}}$  (mg/MJ) represents the mass of metal emissions from delivering unit mega-joule heat to the pot by a given fuel/stove combination.  $EF_{\text{task-time}}$  (mg/hr) represents the mass of metal emissions from unit cooking time.  $EF_{\text{mass}}$  (mg/kg) is the EFs based on fuel mass. HV (MJ/kg) is the upper-heat calorific value of biomass fuels.  $\eta$  is stove efficiency (%). J (MJ/task) is the energy delivered to the pot per task, and here was defined as 1 MJ heat to the pot. HV was measured in the study and  $\eta$  was cited from literature<sup>1</sup>.  $R_b$  is burning rate (kg/min). T is cooking time, and here was defined as 1 hr.

Table S4 Parameters for calculation of the task-based emission factors

| Equipment          | Biomass           | HV (MJ/kg) | $\eta$ (%) <sup>1</sup> | HV* $\eta$ |
|--------------------|-------------------|------------|-------------------------|------------|
| Pellet burner      | Pine wood pellet  | 17.83      | 43                      | 7.67       |
|                    | Corn straw pellet | 15.24      | 43                      | 6.55       |
| Conventional stove | Pine wood chip    | 18.51      | 13                      | 2.41       |
|                    | Corn straw        | 17.26      | 13                      | 2.24       |

<sup>1</sup> cited from Fan et al., 2010

### Additional References

1. Fan X., Lv Z., Li D., Yu X. Performance of cooking stoves with biomass pellet fuel. Transactions of the Chinese Society of Agricultural Machinery 26(2): 280-284 (2010). (in Chinese with English abstract)
